# Supplementary material for: Identification of a Monoclonal Antibody against Porcine Deltacoronavirus Membrane Protein
Source: MDPI journal article supplement (doi:10.3390/ijms241813934), 2023-09-11
Supplement: s1 [file s1]

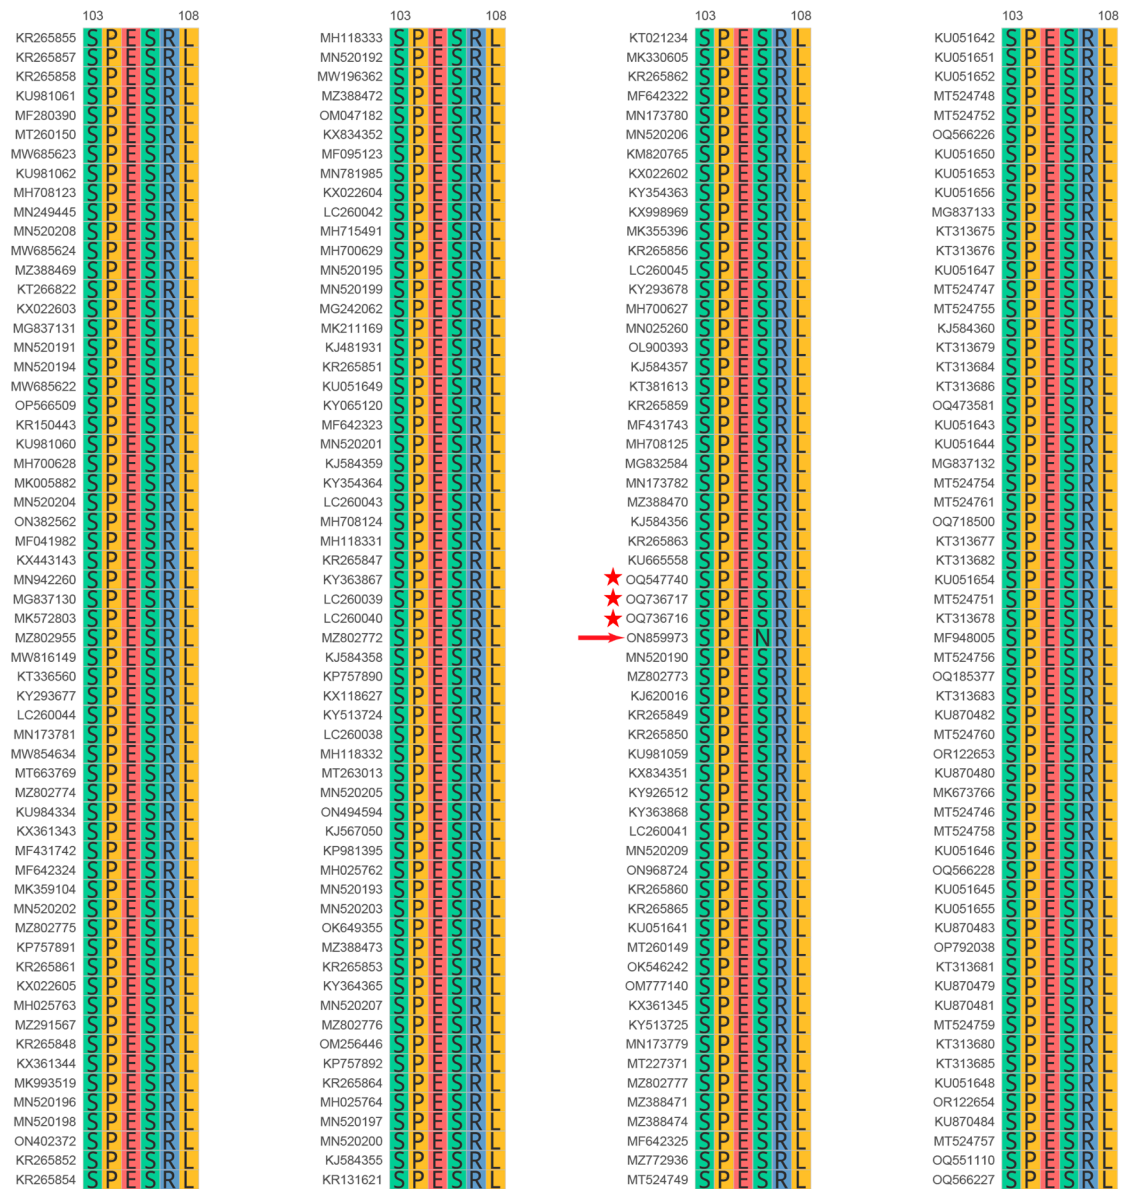

**Figure S1.** Comparison of the epitope sequences recognized by mAb 24-A6 among 240 PDCoV strains. Red pentagrams indicate the strains used in this experiment. Red arrow indicates the strain with mutation.

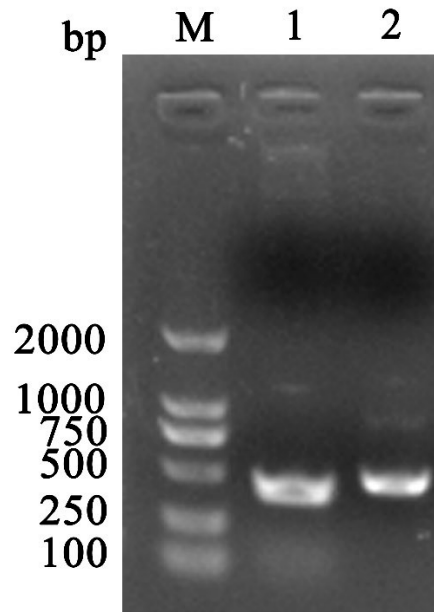

**Figure S2.** Amplified products of the VH and VL genes of mAb 24-A6. Amplified products of the truncated M gene. Lane M, DL2000 Maker; lane 1, PCR products of the VL gene; lane 2, PCR products of the VH gene.
